# Supplementary material for: Transient Waterlogging Events Impair Shoot and Root Physiology and Reduce Grain Yield of Durum Wheat Cultivars
Source: MDPI journal article supplement (doi:10.3390/plants10112357), 2021-11-01
Supplement: s1 [file s1]

## Supplementary Material

**Table S1.** Principal growth stages of durum wheat cultivars Emilio Lepido and Svevo subjected to 0, 14 or 35 days of waterlogging (C, WL14, WL35).

| Growth stage           | BBCH code | Emilio Lepido |             |             | Svevo       |             |             |
|------------------------|-----------|---------------|-------------|-------------|-------------|-------------|-------------|
|                        |           | C             | WL14        | WL35        | C           | WL14        | WL35        |
| Beginning of tillering | 20        | 24 February   | 24 February | 24 February | 24 February | 24 February | 24 February |
| First node detectable  | 31        | 10 March      | 10 March    | 10 March    | 10 March    | 10 March    | 10 March    |
| Flowering              | 65        | 6 May         | 6 May       | 15 May      | 6 May       | 6 May       | 15 May      |
| Maturity               | 99        | 29 June       | 29 June     | 29 June     | 29 June     | 29 June     | 29 June     |

**Table S2.** Physiological parameters of the durum wheat cultivars Emilio Lepido and Svevo subjected to 0, 14 or 35 days of waterlogging (C, WL14, and WL35, respectively), measured during recovery (70 days from the beginning of waterlogging).

F values and *p* levels (\*\*\*:  $p \leq 0.001$ , \*\*:  $p \leq 0.01$ , \*:  $p \leq 0.05$ , ns:  $p > 0.05$ ) of two-way analysis of variance (ANOVA) for the effects of cultivar (C; degrees of freedom, df: 1), waterlogging (WL; df: 2) and their interaction ( $C \times WL$ ; df: 2) on parameters are shown. In case two-way ANOVA reveals a significant  $C \times WL$  interactive effect on the specific parameter, according to Tukey's *post hoc* test, different letters indicate significant differences among means ( $p \leq 0.05$ ).

| Parameter     | Emilio Lepido |             |             | Svevo        |              |              | ANOVA    |           |               |
|---------------|---------------|-------------|-------------|--------------|--------------|--------------|----------|-----------|---------------|
|               | C             | WL14        | WL35        | C            | WL14         | WL35         | C        | WL        | $C \times WL$ |
| A             | 9.3±0.8 a     | 14.2±1.4 c  | 9.7±0.1 a   | 9.9±0.7 ab   | 12.5±0.2 bc  | 13.2±2.3 c   | 2.75 ns  | 19.83 *** | 9.58 ***      |
| $g_s$         | 0.13±0.02     | 0.18±0.02   | 0.18±0.04   | 0.16±0.03    | 0.20±0.00    | 0.24±0.03    | 13.50 ** | 14.29 *** | 1.60 ns       |
| $C_i$         | 262±2         | 251±5       | 285±19      | 275±23       | 278±1        | 289±6        | 7.88 *   | 6.88 **   | 1.73 ns       |
| $WUE_{in}$    | 73±3          | 77±1        | 57±13       | 64±15        | 62±1         | 55±3         | 6.70 ns  | 6.10 **   | 1.30 ns       |
| $F_v/F_m$     | 0.78±0.01     | 0.79±0.01   | 0.80±0.00   | 0.78±0.00    | 0.79±0.02    | 0.78±0.01    | 2.02 ns  | 0.77 ns   | 1.77 ns       |
| $\Phi_{PSII}$ | 0.56±0.01 a   | 0.56±0.03 a | 0.64±0.01 c | 0.59±0.01 ab | 0.60±0.02 bc | 0.62±0.03 bc | 4.23 ns  | 21.19 *** | 7.50 **       |
| qP            | 0.80±0.01 ab  | 0.80±0.02 a | 0.89±0.01 c | 0.85±0.00 bc | 0.85±0.01 bc | 0.87±0.05 c  | 8.41 **  | 17.95 *** | 6.91 **       |
| qNP           | 0.46±0.00 b   | 0.46±0.06 b | 0.34±0.02 a | 0.46±0.01 b  | 0.35±0.04 a  | 0.29±0.03 a  | 13.39 ** | 34.38 *** | 5.56 *        |

Parameters: A, CO<sub>2</sub> assimilation rate ( $\mu\text{mol m}^{-2} \text{s}^{-1}$ );  $g_s$ , stomatal conductance ( $\text{mol m}^{-2} \text{s}^{-1}$ );  $C_i$ , intercellular CO<sub>2</sub> carbon concentration ( $\mu\text{mol mol}^{-1}$ );  $WUE_{in}$ , intrinsic water use efficiency (i.e.,  $A/g_s$ ;  $\mu\text{mol mol}^{-1}$ );  $F_v/F_m$ , maximum quantum efficiency of the photosystem II (PSII) photochemistry;  $\Phi_{PSII}$ , PSII operating efficiency in light conditions; qP, photochemical quenching; qNP, non-photochemical quenching.
